# Supplementary material for: The Phosphoinositide 3-Kinase Signaling Pathway is Involved in the Control of Modified Low-Density Lipoprotein Uptake by Human Macrophages
Source: PubMed Central journal article supplement (PMC4339697; doi:10.1007/s11745-015-3993-0), 2015-02-08
Supplement: 11745_2015_3993_MOESM1_ESM.pdf [file 11745_2015_3993_MOESM1_ESM.pdf]

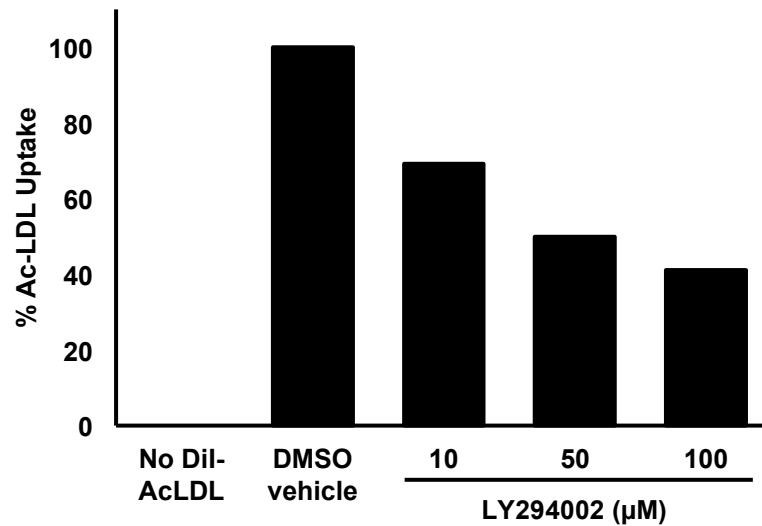

**Supplementary Figure 1. LY294002 attenuates AcLDL uptake by THP-1 macrophages in a concentration dependent manner**

The uptake of Dil-AcLDL was determined in response to 24 h incubation with DMSO vehicle control or the indicated concentration of LY294002. The uptake in vehicle treated cells has been arbitrarily assigned as 100%. Data represents mean of duplicate samples from one experiment.

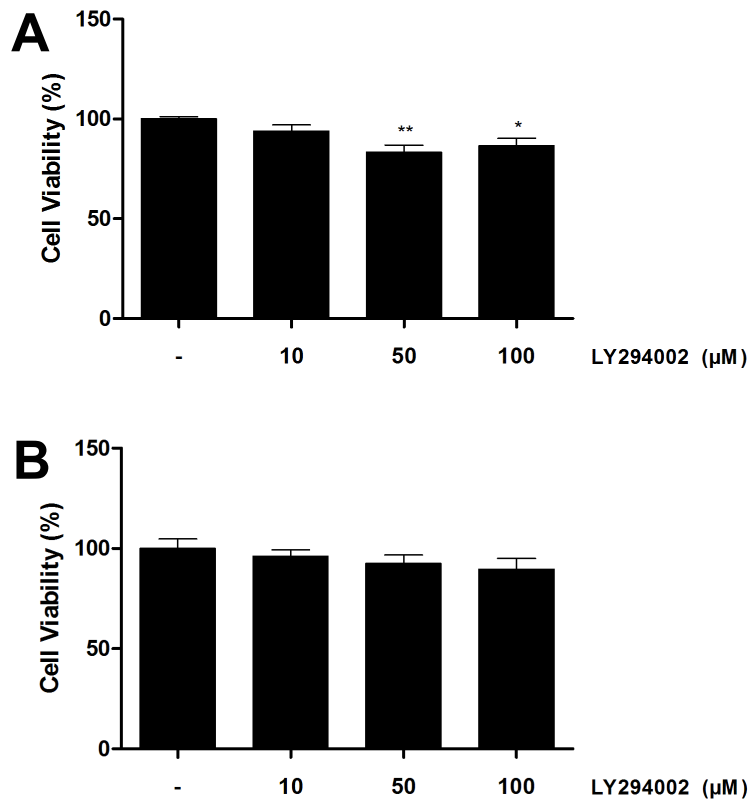

**Supplementary Figure 2. The effect of LY294002 on the viability of THP-1 macrophages and HMDM**

THP-1 macrophages (A) or HMDM (B) were incubated for 24 h with the DMSO vehicle (-) or the indicated concentration of LY294002. Cell viability was determined using crystal violet. Cell viability in the presence of LY294002 (mean  $\pm$  SD from three independent experiments) is represented to control cells, which has been arbitrarily assigned as 100%. Statistical analysis was performed using one-way ANOVA with Tukey's post-hoc analysis, \* $P < 0.05$ , \*\* $P < 0.01$ .

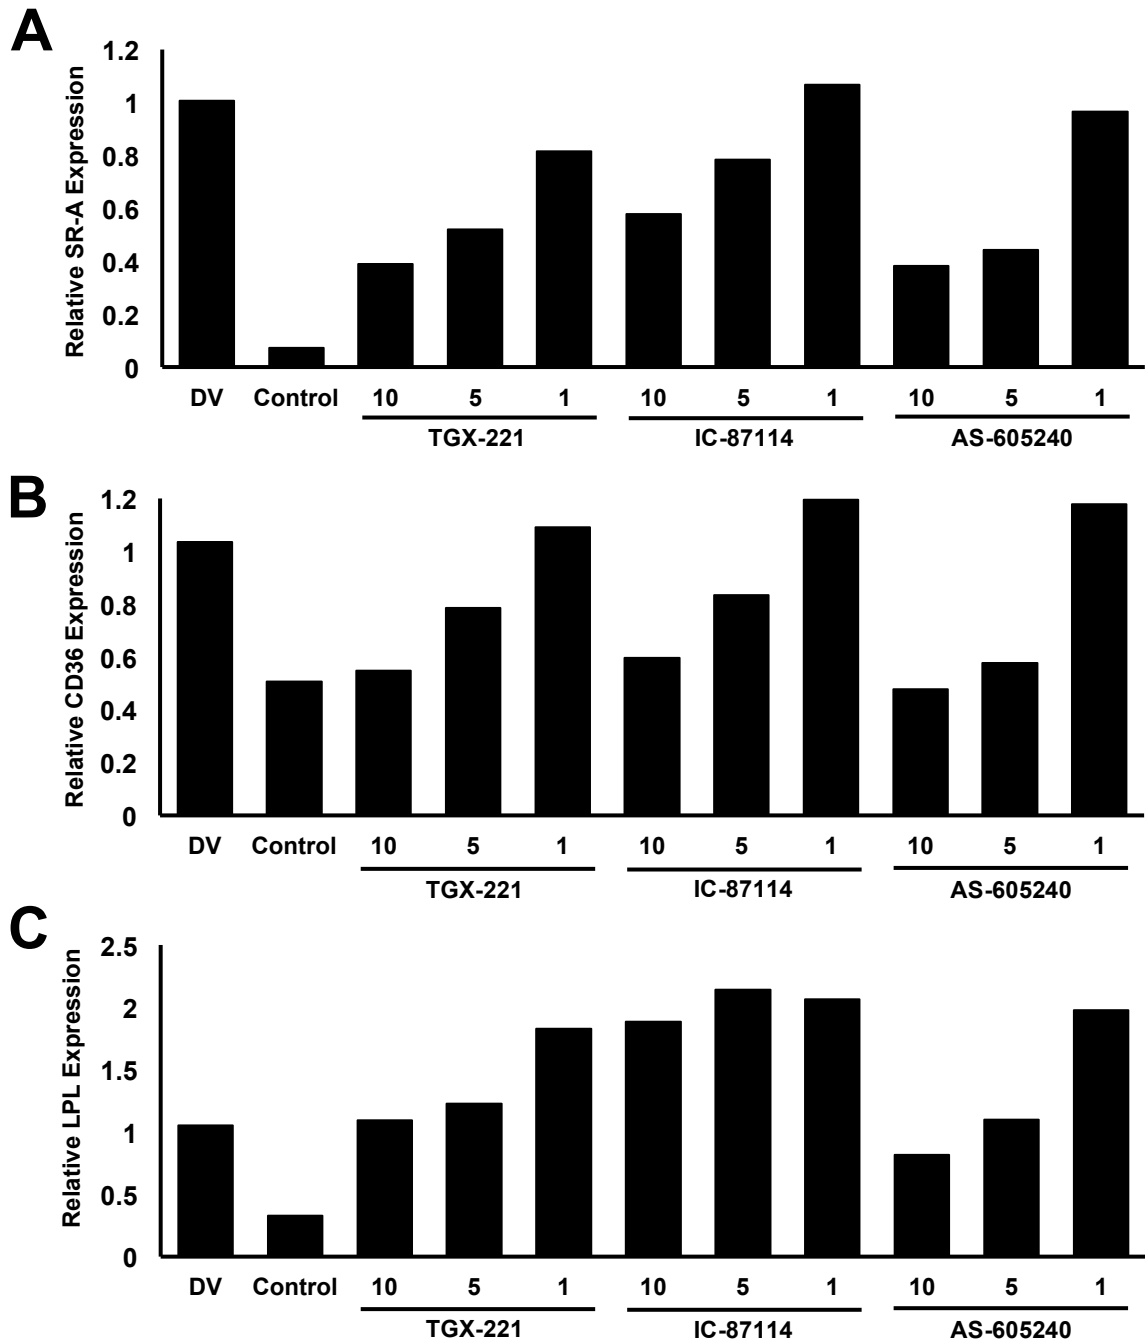

**Supplementary Figure 3. The effect of isoform-specific PI3K inhibitors on the expression of SR-A, CD36 and LPL**

THP-1 macrophages were incubated for 24 h with the DMSO vehicle (DV) or 10  $\mu$ M LY294002 (control) or the indicated concentration of TGX-221, IC-87114 or AS-605240. Total RNA was subjected to real-time quantitative PCR using primers against (A) SR-A, (B) CD36 or (C) LPL as indicated. The

mRNA expression levels were calculated using the comparative *Ct* method and normalized to RPL13A with vehicle-treated cells given an arbitrary value of 1. Data represents the mean of two independent experiments performed with triplicate samples.
